# Supplementary material
Source: PubMed Central journal article supplement (PMC5038053)
Supplement: AEM.01671-16_zam999117441so1.pdf [file AEM.01671-16_zam999117441so1.pdf]

**Table 1: Primers and PCR programs used in this study for deletion mutagenesis and cloning.**

| Primer                 | Nucleotide sequence (5' - 3')                                                 | Target                                                                                                                    | PCR program                                                              |
|------------------------|-------------------------------------------------------------------------------|---------------------------------------------------------------------------------------------------------------------------|--------------------------------------------------------------------------|
| del- <i>nanS</i> -for1 | CGCCCGATTATTACTATGTTCTTACCGTTGCTG<br>GTCAGTCgcgattgtgtaggctggagc <sup>1</sup> | FRT-flanked kanamycin<br>resistance cassette on pKD4<br>with homologies to <i>nanS</i> of <i>E.</i><br><i>coli</i> C600   | 1 x 95 °C, 300 s<br><br>30 x (95 °C, 30 s ; 59 °C, 60<br>s; 72 °C, 90 s) |
| del- <i>nanS</i> -rev1 | AGTGCTGAAATGACTGCTTCGCAGTGCCGTCG<br>TCCAGTTCcatggtccatagaatcctcc <sup>1</sup> |                                                                                                                           |                                                                          |
| del- <i>nanS</i> -for2 | TTACTATGTTCTTACTGTTGCTGGTCAGTCTAA<br>TGCCATgtgtaggctggagctgctcg <sup>1</sup>  | FRT-flanked kanamycin<br>resistance cassette on pKD4<br>with homologies to <i>nanS</i> of <i>E.</i><br><i>coli</i> EDL933 | 1 x 72 °C, 300 s <sup>4</sup>                                            |
| del- <i>nanS</i> -rev2 | AACTGCAAAATTGCTTCTACAAACCTGTCAGAA<br>ATAATCCCatatgaatcctccttag <sup>1</sup>   |                                                                                                                           |                                                                          |

|               |                                                                                                                                      |                                                                                                                        |
|---------------|--------------------------------------------------------------------------------------------------------------------------------------|------------------------------------------------------------------------------------------------------------------------|
| Del-Z1466-for | ATGGCATTAAACACTATGATGTTGTCAGGGCG                                                                                                     | FRT-flanked kanamycin<br>resistance cassette on pKD4<br>with homologies to <i>nanS</i> -p1 of<br><i>E. coli</i> EDL933 |
| Del-Z1466-rev | GCGTCGCCGgcgattgttaggctggagc <sup>1</sup><br><br>TGCCGCAGTGTCTGTGCTGTTCACTCCCACCG<br>CAATGCTGTCcatggtccatatgaatatcctcc <sup>1</sup>  |                                                                                                                        |
| Del-Z3342-for | ATGGCATTAAACACTACGATGTGGTCAGGGC                                                                                                      | FRT-flanked kanamycin<br>resistance cassette on pKD4<br>with homologies to <i>nanS</i> -p2 of<br><i>E. coli</i> EDL933 |
| Del-Z3342-rev | GGCATCGCCGgcgattgttaggctggagc <sup>1</sup><br><br>TGCCGCAGTGTCTGTGTTGTTCACTTCCACCG<br>CAATGCTGTCcatggtccatatgaatatcctcc <sup>1</sup> |                                                                                                                        |
| Del-Z1466-for | See above                                                                                                                            | FRT-flanked kanamycin<br>resistance cassette on pKD4<br>with homologies to <i>nanS</i> -p3 of<br><i>E. coli</i> EDL933 |
| Del-Z1793-rev | TTATGATGATGCCGGTGCATTTATCTCCAGCAC<br>CAGACTTTCcatggtccatatgaatatcctcc <sup>1</sup>                                                   |                                                                                                                        |

|                  |                                                                                    |                                                                                    |  |
|------------------|------------------------------------------------------------------------------------|------------------------------------------------------------------------------------|--|
| Del-Z2377-for    | CGCCGTCAGACCTTGCGGAAAAGCTGACACAC<br>AAACTGAAAGgcgattgtgtaggctggagc <sup>1</sup>    | FRT-flanked kanamycin<br>resistance cassette on pKD4                               |  |
| Del-Z2377-rev    | GCATTTATCTCCAGCATCAGACTTTCTATCTCA<br>ACGCCATACcatggtccatatgaatatcctcc <sup>1</sup> | with homologies to <i>nanS</i> -p4<br>and <i>nanSp</i> -7 of <i>E. coli</i> EDL933 |  |
| Del-Z3926/27-for | GTGTGTCATTCAGGCTTCCGGACTACAGCCCA<br>CTCCATATgcgattgtgtaggctggagc <sup>1</sup>      | FRT-flanked kanamycin<br>resistance cassette on pKD4                               |  |
| Del-Z2377-rev    | See above                                                                          | with homologies to <i>nanS</i> -p5 of<br><i>E. coli</i> EDL933                     |  |
| Del-Z2377-for    | See above                                                                          | FRT-flanked kanamycin<br>resistance cassette on pKD4                               |  |
| Del-Z1793-rev    | See above                                                                          | with homologies to <i>nanS</i> -p6 of<br><i>E. coli</i> EDL933                     |  |

|                                             |                                                          |                                                 |                                                                                                                   |
|---------------------------------------------|----------------------------------------------------------|-------------------------------------------------|-------------------------------------------------------------------------------------------------------------------|
| <p><i>nanS</i>-for</p> <p><i>nanS</i>-r</p> | <p>ATGAACGCAATAATATCGCC</p> <p>TCGCGCCAAAAGTGC AAAAT</p> | <p>Confirmation of <i>nanS</i> deletion</p>     | <p>1 x 95 °C, 300 s</p> <p>30 x (95 °C, 30 s ; 49 °C, 30 s; 68 °C, 60 s)</p> <p>1 x 68 °C, 300 s<sup>6</sup></p>  |
| <p>Stx2b-182-for</p> <p>Z1466-r</p>         | <p>CTCAGTTGACAGGAATGAC</p> <p>TGCCGCAGTGTCTGTGCTG</p>    | <p>Confirmation of <i>nanS</i>-p1a deletion</p> | <p>1 x 95 °C, 300 s</p> <p>30 x (95 °C, 30 s ; 57 °C, 30 s; 68 °C, 150 s)</p> <p>1 x 68 °C, 300 s<sup>6</sup></p> |
| <p>Stx1b-168-for</p> <p>Z3342-r</p>         | <p>TCAGTCTCTTCTTCTCAGT</p> <p>TGCCGCAGTGTCTGTGTTG</p>    | <p>Confirmation of <i>nanS</i>-p2 deletion</p>  | <p>1 x 95 °C, 300 s</p> <p>30 x (95 °C, 30 s ; 49 °C, 30 s; 68 °C, 150 s)</p> <p>1 x 68 °C, 300 s<sup>6</sup></p> |

|                                  |                                                |                                             |                                                                                                        |
|----------------------------------|------------------------------------------------|---------------------------------------------|--------------------------------------------------------------------------------------------------------|
| Z1793-for (2)<br>Z1793-r         | AAAAGTAAAAATGAAGGGC<br>ATCTCCAGCACCAGACTTTC    | Confirmation of <i>nanS</i> -p3<br>deletion | 1 x 95 °C, 300 s<br>30 x (95 °C, 30 s ; 50 °C, 30 s;<br>68 °C, 180 s)<br>1 x 68 °C, 300 s <sup>6</sup> |
| Z6054-for<br>Z6054-rev           | TACGGAGTGGTCAGTGTG<br>CCGACAGAAAATGAAAGTAA     | Confirmation of <i>nanS</i> -p4<br>deletion | 1 x 95 °C, 300 s<br>30 x (95 °C, 30 s ; 57 °C, 30 s;<br>68 °C, 210 s)<br>1 x 68 °C, 300 s <sup>6</sup> |
| Z3926/27-for<br>Z3926/27-rev (2) | TGTTGGTACTGACTGATGGC<br>AGCCACCAGTTAACTACTGATG | Confirmation of <i>nanS</i> -p5<br>deletion | 1 x 95 °C, 300 s<br>30 x (95 °C, 30 s ; 55 °C, 30 s;<br>68 °C, 150 s)<br>1 x 68 °C, 300 s <sup>6</sup> |

|                                                    |                                                                                                           |                                             |                                                                                                        |
|----------------------------------------------------|-----------------------------------------------------------------------------------------------------------|---------------------------------------------|--------------------------------------------------------------------------------------------------------|
| 1985-for<br>1985-rev                               | GAGATTAGGCATATATCCAGGCTTC<br>TGGCTCTGATAACTCATGCAGGCG                                                     | Confirmation of <i>nanS</i> -p6<br>deletion | 1 x 95 °C, 300 s<br>30 x (95 °C, 30 s ; 59 °C, 30 s;<br>68 °C, 120 s)<br>1 x 68 °C, 300 s <sup>6</sup> |
| 3022-for (2)<br>3022-rev (2)                       | GGTGGGGCAATCAGCAAGAAGGA<br>CCAGTATGAACCGCCCCGG                                                            | Confirmation of <i>nanS</i> -p7<br>deletion | 1 x 95 °C, 300 s<br>30 x (95 °C, 30 s ; 58 °C, 30 s;<br>68 °C, 270 s)<br>1 x 68 °C, 300 s <sup>6</sup> |
| z6054- <i>Nde</i> I-for<br>z6054- <i>Xho</i> I-rev | <b>CCCCATATG</b> TCGATTAACATTATGATGTTG <sup>2</sup><br>AA <b>ACTCGAG</b> TGCTGCCGGTGCATTTATC <sup>2</sup> | <i>nanS</i> -p4                             | 1 x 98 °C, 60 s<br>30 x (98 °C, 10 s; 66 °C, 30 s;<br>72 °C, 60 s)<br>1 x 72 °C, 600 s <sup>5</sup>    |

|                                                    |                                                                                                           |                                              |                                                                                                   |
|----------------------------------------------------|-----------------------------------------------------------------------------------------------------------|----------------------------------------------|---------------------------------------------------------------------------------------------------|
| z3342-for<br>z3342-rev                             | GCGAATAATATCCGACAGTAATCAC<br>AAACCAGAGCACGAAAGTATCG                                                       | <i>nanS</i> -p2 with flanking region         | 1 x 98 °C, 60 s<br>28 x (98 °C, 10 s; 67 °C, 30 s; 72 °C, 60 s)<br>1 x 72 °C, 600 s <sup>5</sup>  |
| z3342-18A/C-for<br>z3342-13T/G-rev                 | CTTCCGCTGCCGGAGACCTATGACCGTCCG <sup>3</sup><br>CGGACGGTCATAGGTCTCCGGCAGCGGAAG <sup>3</sup>                | <i>nanS</i> -p2 in pGEM <sup>®</sup> -T easy | 1 x 98 °C, 30 s<br>12 x (98 °C, 30 s; 55 °C, 60 s; 72 °C, 320 s)<br>1 x 72 °C, 300 s <sup>5</sup> |
| z3342- <i>Nde</i> I-for<br>z3342- <i>Xho</i> I-rev | CCCC <b>ATATGG</b> CATTTAAACACTACGATGTG <sup>2</sup><br>AA <b>ACTCGAGT</b> GCCGCAGTGTCTGTGTT <sup>2</sup> | <i>nanS</i> -p2                              | 1 x 98 °C, 30 s<br>30 x (98 °C, 10 s; 66 °C, 60 s; 72 °C, 60 s)<br>1 x 72 °C, 600 s <sup>5</sup>  |

|                              |                                                           |                                                    |                                                                                                       |
|------------------------------|-----------------------------------------------------------|----------------------------------------------------|-------------------------------------------------------------------------------------------------------|
| M13-for<br>M13-rev           | GTTTTCCCAGTCACGAC <sup>7</sup><br>AACAGCTATGACCATG        | pGEM <sup>®</sup> -T easy next to insert<br>region | 1 x 95 °C, 300 s<br>30 x (95 °C, 30 s; 55 °C, 30<br>s; 68 °C, 150 s)<br>1 x 68 °C, 300 s <sup>6</sup> |
| nanShom1-for<br>nanShom1-rev | CAGGATATGAGTACGCTGAATCATCCG<br>GGAATATCCGGATCTTCTGCCGGCGC | <i>nanS</i> -p3-p7                                 | 1 x 95 °C, 300 s<br>30 x (95 °C, 30 s; 64 °C, 30<br>s; 68 °C, 45 s)<br>1 x 68 °C, 300 s <sup>6</sup>  |
| nanShom3-for<br>nanShom3-rev | AACCGTGGGGCAGGGGCTGCATAT<br>TCCGGGTCTTCTTCCGGTTTGTTTCGT   | <i>nanS</i> -p1a-p2                                | 1 x 95 °C, 300 s<br>30 x (95 °C, 30 s; 65 °C, 30<br>s; 68 °C, 45 s)<br>1 x 68 °C, 300 s <sup>6</sup>  |

<sup>1</sup> Capital letters depict the complementary parts to the gene which should be deleted; small letters depict the complementary part to the FRT-flanked kanamycin resistance cassette on plasmid pKD4. <sup>2</sup> Bold letters indicate the restriction site of *Nde*I or



*Xho*I, respectively. <sup>3</sup> The bold letter indicates the base used for mutagenesis. <sup>4</sup> Taq DNA polymerase from Genaxxon. <sup>5</sup>

Phusion DNA polymerase from Thermo Scientific; <sup>6</sup> Taq DNA polymerase from New England Biolabs® GmbH ; <sup>7</sup>Promega

GmbH
